# Supplementary material for: Human-correlated genetic HCC models identify combination therapy for precision medicine
Source: Research Square preprint supplement (doi:10.21203/rs.3.rs-1638504/v1), 2022-05-12
Supplement: Supplementary file 1 [file 6f40c18b8168d59a2c2ffb0a.xlsx]

## Sheet: Extended_Data_Table_3
Antibody	det_species	Manufacturer	Cat_no	Application	Dilution	Notes
GS	mouse	Abcam	ab49873	IF	1/500 or 1/1000
GS	mouse	Sigma-Aldrich	HPA007316	IHC	1/1000
GS	human	Sigma-Aldrich	HPA007316	IHC	1/1000
Sox9	mouse	Milliore	AB5535	IHC	1/500
GFP	NA	Cell Signalling	2555	IF	1/600
HNF4a	mouse	Santa Cruz	SC6556	IF	1/100	discontinued - used Biotechne antibody subsequently
HNF4a	mouse	Biotechne	PP-H1415-00	IF	1/500
RFP	NA	Rockland	#601-401-379	IF	1/100
F4/80	mouse	AbD SeroTec	MCA497	IHC	1/150
CD68	human	Dako	M0876	IHC	1/400
CD4	mouse	eBioscience	14-9766-82	IHC	1 to 75
CD4	human	Dako	M7310	IHC	1 to 35
CD8a	mouse	eBioscience	14-0808-82	IHC	1 to 75
CD8a	human	AbD SeroTec	MCA1817T	IHC	1 to 30
Ki67	mouse	Abcam	ab16667	IF	1/200
Ki67	mouse	Cell Signalling	ask COLIN	IHC	1/1000
cleaved Caspase 3	mouse	Cell Signalling	9661	IHC	1/500
CD3	mouse	Abcam	ab16669	IHC	1/100
yH2AX	mouse	Cell Signalling	9718	IHC	1/120
p53	mouse	Leica	NCL-L-p53CM5p	IHC	1/150
Ctnnb1	mouse	BD	BD610154	IF	1 to 50
