# Supplementary material for: Human-correlated genetic HCC models identify combination therapy for precision medicine
Source: Research Square preprint supplement (doi:10.21203/rs.3.rs-1638504/v1), 2022-05-12
Supplement: Supplementary file 2 [file ad96da61dcf34c6662c8f716.xlsx]

## Sheet: Extended_Data_Table_1
Cohort	Transcriptomics_data	Ctnnb1_exon3_fl	R26_MYC_LSL	Tp53_fl	Tp53_R172H	Cdkn2a_KO	Pten_fl	R26_Notch1_ICD	KrasG12D	Cdkn1a_KO	Axin1_fl	Cre	Model	Toxin	Diet	Sex	N_survival	N_trans	Tumorpenetrance	Median_Survival	Bleeder	Metastasis	Ki67_in_Tumor
1	N	HET	WT	WT	WT	WT	WT	WT	WT	WT	WT	6.4*10^8	GEMM	none	NC	male	11		0	NA	NA	NA	NA
2	N	WT	HOM	WT	WT	WT	WT	WT	WT	WT	WT	6.4*10^8	GEMM	none	NC	male	8		0	NA	NA	NA	NA
3	N	HET	HET	WT	WT	WT	WT	WT	WT	WT	WT	6.4*10^8	GEMM	none	NC	male	14		100	200	21.42	76.92	NA
4	N	HET	HOM	WT	WT	WT	WT	WT	WT	WT	WT	1.2.8*10^8	GEMM	none	NC	male	9		88.89	162	50	25	NA
5	Y	HET	HOM	WT	WT	WT	WT	WT	WT	WT	WT	6.4*10^8	GEMM	none	NC	male	53	7	100	135	9.43	15.09	21.96
6	Y	HET	HOM	WT	WT	WT	WT	WT	WT	WT	WT	6.4*10^8	GEMM	none	NC	female	22	7	100	201	4.55	28.57	29.22
7	N	HOM	HOM	WT	WT	WT	WT	WT	WT	WT	WT	6.4*10^8	GEMM	none	NC	male	3		100	119	33.33	0	NA
8	Y	HET	HOM	WT	WT	WT	WT	WT	WT	HOM	WT	6.4*10^8	GEMM	none	NC	male	25	7	100	117	8	21.73	27.16
9	N	WT	HOM	HOM	WT	WT	WT	WT	WT	WT	WT	6.4*10^8	GEMM	none	NC	male	11		0	NA	NA	NA	NA
10	Y	HET	HOM	HET	WT	WT	WT	WT	WT	WT	WT	6.4*10^8	GEMM	none	NC	male	10	7	100	131	0	20	18.78
11	Y	HET	HOM	HOM	WT	WT	WT	WT	WT	WT	WT	6.4*10^8	GEMM	none	NC	male	10	7	100	146.5	0	30	24.23
12	Y	HET	HOM	WT	WT	HOM	WT	WT	WT	WT	WT	6.4*10^8	GEMM	none	NC	male	7	7	57.14	131	25	25	33.91
13	Y	HET	HOM	HET	WT	HOM	WT	WT	WT	WT	WT	6.4*10^8	GEMM	none	NC	male	7	5	100	129	14.28	20	26.59
14	Y	HET	HOM	WT	WT	HOM	HOM	WT	WT	WT	WT	1.2.8*10^8	GEMM	none	NC	male	8	7	100	91.5	12.5	62.5	34
15	Y	HET	HOM	HET	WT	HOM	HOM	WT	WT	WT	WT	1.2.8*10^8	GEMM	none	NC	male	6	6	100	89.5	16.67	83.33	40.76
16	Y	HET	WT	HET	WT	HOM	HOM	WT	WT	WT	WT	6.4*10^8	GEMM	none	NC	male	9	7	100	113	100	11.11	33.9
17	N	WT	WT	WT	HET	WT	HOM	WT	WT	WT	WT	6.4*10^8	GEMM	none	NC	male	8		25	NA	NA	NA	NA
18	N	WT	HOM	WT	HET	WT	WT	WT	WT	WT	WT	6.4*10^8	GEMM	none	NC	male	8		0	NA	NA	NA	NA
19	Y	HET	HOM	WT	HET	WT	WT	WT	WT	WT	WT	6.4*10^8	GEMM	none	NC	male	11	7	100	141	27.27	81.81	20.92
20	Y	HET	HOM	WT	HET	HOM	WT	WT	WT	WT	WT	6.4*10^8	GEMM	none	NC	male	8	7	100	120	37.5	14.28	33.54
21	Y	HET	WT	WT	HET	WT	HOM	WT	WT	WT	WT	6.4*10^8	GEMM	none	NC	male	8	6	75	174	66.67	16.67	29.24
22	Y	HET	WT	WT	HET	HOM	HOM	WT	WT	WT	WT	6.4*10^8	GEMM	none	NC	male	7	7	100	117	85.71	0	38.89
23	Y	HET	HOM	WT	HET	HOM	HOM	WT	WT	WT	WT	1.2.8*10^8	GEMM	none	NC	male	9	7	100	88	33.33	88.88	36.08
24	Y	HET	HOM	WT	HET	HOM	HOM	WT	WT	WT	WT	1.2.8*10^8	GEMM	none	NC	female	10	7	100	99.5	10	90	44.26
25	N	HET	WT	WT	WT	WT	WT	WT	WT	HOM	WT	6.4*10^8	GEMM	none	NC	male	7		0	NA	NA	NA	NA
26	N	WT	HOM	WT	WT	WT	WT	WT	WT	HOM	WT	6.4*10^8	GEMM	none	NC	male	8		0	NA	NA	NA	NA
27	Y	WT	HOM	WT	WT	HOM	HOM	WT	WT	WT	WT	6.4*10^8	GEMM	none	NC	male	6	6	16.67	NA	NA	NA	NA
28	Y	HET	WT	WT	WT	HOM	HOM	WT	WT	WT	WT	6.4*10^8	GEMM	none	NC	male	7	7	57.14	142	75	25	32.95
29	Y	HET	HET	WT	WT	WT	WT	HET	WT	WT	WT	6.4*10^8	GEMM	none	NC	male	9	7	100	111	0	11.11	37.08
30	Y	HET	WT	WT	WT	WT	WT	HOM	WT	WT	WT	6.4*10^8	GEMM	none	NC	male	10	7	90	230	22.22	22.22	33.26
31	Y	WT	HOM	WT	WT	WT	WT	WT	WT	WT	HOM	6.4*10^8	GEMM	none	NC	male	13	6	46.15	NA	0	0	20.66
32	Y	WT	HOM	WT	WT	WT	WT	WT	HET	WT	WT	6.4*10^8	GEMM	none	NC	male	7	6	100	260.5	14.28	14.28	11.42
33	N	HET	WT	WT	WT	WT	HET	WT	WT	WT	WT	6.4*10^8	GEMM	none	NC	male	6		16.67	NA	NA	NA	NA
34	N	WT	HOM	WT	WT	WT	HOM	WT	WT	WT	WT	6.4*10^8	GEMM	none	NC	male	8		87.5	253	0	0	12.56
35	Y	WT	HOM	WT	HET	WT	HOM	WT	WT	WT	WT	6.4*10^8	GEMM	none	NC	male	9	7	100	206	0	11.11	10.68
36	Y	HET	HOM	WT	WT	WT	WT	WT	WT	WT	WT	AAV-Cre-Null	GEMM	none	NC	male		5	ND	ND	ND	ND	ND
37	Y	HET	HOM	WT	WT	WT	WT	WT	WT	WT	WT	6.4*10^8	GEMM/TOX	CCl4	MWD	male		6	ND	ND	ND	ND	ND
38	Y	WT	WT	WT	WT	WT	WT	WT	WT	WT	WT	none	TOX	DEN	ALIOS	male		9	ND	ND	ND	ND	ND
39	Y	WT	WT	WT	WT	WT	WT	WT	WT	WT	WT	none	TOX	CCl4	MWD	male		5	ND	ND	ND	ND	ND
40	Y	WT	WT	WT	WT	WT	WT	WT	WT	WT	WT	none	TOX	STZ	HFD	male/female		8	ND	ND	ND	ND	ND
41	Y	WT	WT	WT	WT	WT	WT	WT	WT	WT	WT	none	OT	none	NC	male		5	ND	ND	ND	ND	ND
