# Supplementary material for: Human-correlated genetic HCC models identify combination therapy for precision medicine
Source: Research Square preprint supplement (doi:10.21203/rs.3.rs-1638504/v1), 2022-05-12
Supplement: Supplementary file 4 [file cd403bbd118581a2406126ca.xlsx]

## Sheet: Extended_Data_Table_2
Rank	Drug	Drug_categories
1	Idarubicin hydrochloride	Topoisomerase Inhibitor
2	Cladribine	Antimetabolite
3	Triethylenemelamine	Alkylating Agent
4	Gemcitabine hydrochloride	Antimetabolite
5	Doxorubicin hydrochloride	Topoisomerase Inhibitor
6	Cytarabine hydrochloride	Antimetabolite
7	Clofarabine	Antimetabolite
8	Decitabine	Antimetabolite
9	Azacitidine	Antimetabolite
10	Paclitaxel	Antimicrotubular
11	Oxaliplatin	Alkylating Agent
12	Bortezomib	Proteasome Inhibitor
13	Copanlisib	PI3K mTOR Inhibitor
14	Bleomycin sulfate	Antibiotic
15	Osimertinib	TKI
16	Valrubicin	Topoisomerase Inhibitor
17	Thioguanine	Antimetabolite
18	Mitomycin	Antibiotic
19	Topotecan hydrochloride	Topoisomerase Inhibitor
20	Brigatinib	TKI
21	Uracil mustard	Alkylating Agent
22	Regorafenib	TKI
23	Omacetaxine mepesuccinate	Other
24	Staurosporin	INTERNAL CONTROL
25	Mitoxantrone	Topoisomerase Inhibitor
26	Abemaciclib	CDK Inhibitor
27	Epirubicin hydrochloride	Topoisomerase Inhibitor
28	Romidepsin	HDAC Inhibitor
29	Vincristine sulfate	Antimicrotubular
30	Sunitinib	TKI
31	Carfilzomib	Proteasome Inhibitor
32	Etoposide	Topoisomerase Inhibitor
33	Ceritinib	TKI
34	Melphalan hydrochloride	Alkylating Agent
35	Ponatinib	TKI
36	Panobinostat	HDAC Inhibitor
37	Cobimetinib	Other Kinase Inhibitor
38	Vinblastine sulfate	Antimicrotubular
39	Plicamycin	Antibiotic
40	Tretinoin	Other
41	Mechlorethamine hydrochloride	Alkylating Agent
42	Vandetanib	TKI
43	Teniposide	Topoisomerase Inhibitor
44	Talazoparib	PARP Inhibitor
45	Neratinib	TKI
46	Dactinomycin	Antibiotic
47	Palbociclib	CDK Inhibitor
48	Abiraterone	Hormonal
49	Docetaxel	Antimicrotubular
50	Sirolimus	PI3K mTOR Inhibitor
51	Cabozantinib	TKI
52	Trametinib	Other Kinase Inhibitor
53	Afatinib	TKI
54	Daunorubicin hydrochloride	Topoisomerase Inhibitor
55	Irinotecan hydrochloride	Topoisomerase Inhibitor
56	Vinorelbine tartrate	Antimicrotubular
57	Lapatinib	TKI
58	Bendamustine hydrochloride	Alkylating Agent
59	Carboplatin	Alkylating Agent
60	Temsirolimus	PI3K mTOR Inhibitor
61	Olaparib	PARP Inhibitor
62	Dacarbazine	Alkylating Agent
63	Ixazomib citrate	Proteasome Inhibitor
64	Cabazitaxel	Antimicrotubular
65	Ibrutinib	TKI
66	Temozolomide	Alkylating Agent
67	Lenvatinib	TKI
68	Larotrectinib	TKI
69	Nelarabine	Antimetabolite
70	Belinostat	HDAC Inhibitor
71	Ifosfamide	Alkylating Agent
72	Floxuridine	Antimetabolite
73	Hydroxyurea	Other
74	Rucaparib phosphate	PARP Inhibitor
75	Everolimus	PI3K mTOR Inhibitor
76	Allopurinol	Other
77	Arsenic trioxide	Other
78	Axitinib	TKI
79	Trifluridine	Antimetabolite
80	Mitotane	Other
81	Ixabepilone	Antimicrotubular
82	Binimetinib	Other Kinase Inhibitor
83	Apalutamide	Hormonal
84	Celecoxib	Other
85	Crizotinib	TKI
86	Thiotepa	Alkylating Agent
87	Procarbazine hydrochloride	Alkylating Agent
88	Cisplatin	Alkylating Agent
89	Enzalutamide	Hormonal
90	Altretamine	Alkylating Agent
91	Megestrol acetate	Hormonal
92	Vorinostat	HDAC Inhibitor
93	Fludarabine phosphate	Antimetabolite
94	Carmustine	Alkylating Agent
95	Idelalisib	PI3K mTOR Inhibitor
96	Chlorambucil	Alkylating Agent
97	Sorafenib internal	TKI
98	Bosutinib	TKI
99	Imatinib	TKI
100	Sorafenib	TKI
101	Pemetrexed, Disodium salt, Heptahydrate	Antimetabolite
102	Ribociclib	CDK Inhibitor
103	Duvelisib	PI3K mTOR Inhibitor
104	Imiquimod	Other
105	Mercaptopurine	Antimetabolite
106	Thalidomide	Other
107	Lenalidomide	Other
108	Pentostatin	Antimetabolite
109	Erismodegib (Sonidegib)	Other
110	Anastrozole	Other
111	Dacomitinib	TKI
112	Pralatrexate	Antimetabolite
113	Fluorouracil	Antimetabolite
114	Exemestane	Other
115	Amifostine	Other
116	Dexrazoxane	Other
117	Acalabrutinib	TKI
118	Pipobroman	Alkylating Agent
119	Aminolevulinic acid hydrochloride	Other
120	Vismodegib	Other
121	Venetoclax	Bcl2 Inhibitor
122	Erlotinib hydrochloride	TKI
123	Pazopanib hydrochloride	TKI
124	Cyclophosphamide	Alkylating Agent
125	Pomalidomide	Other
126	Busulfan	Alkylating Agent
127	Methotrexate	Antimetabolite
128	Streptozocin	Alkylating Agent
129	Letrozole	Other
130	Encorafenib	Other Kinase Inhibitor
131	Raloxifene	Hormonal
132	Estramustine phosphate sodium	Alkylating Agent
133	Empty	INTERNAL CONTROL
134	Enasidenib	Other
135	DMSO	INTERNAL CONTROL
136	Plerixafor	Other
137	Niraparib hydrochloride	PARP Inhibitor
138	Ivosidenib	Other
139	Fulvestrant	Hormonal
140	Lomustine	Alkylating Agent
141	Uridine triacetate	Other
142	Vemurafenib	Other Kinase Inhibitor
143	Capecitabine	Antimetabolite
144	Zoledronic acid	Other
145	Methoxsalen	Other
146	Dabrafenib mesylate	Other Kinase Inhibitor
147	Dasatinib	TKI
148	Gefitinib	TKI
149	Tamoxifen citrate	Hormonal
